# Supplementary material for: Zootherapy as a potential pathway for zoonotic spillover: a mixed-methods study of the use of animal products in medicinal and cultural practices in Nigeria
Source: One Health Outlook. 2022 Feb 26;4:5. doi: 10.1186/s42522-022-00060-3 (PMC8881094; doi:10.1186/s42522-022-00060-3)
Supplement: Supplementary file 4 — Additional file 4. Quantitative Data. (CSV 7 kb) [file 42522_2022_60_MOESM4_ESM.csv]

id1	hunter	village	age	household_size	wealth_index	education	medicinical_use	cultural_use
1410	0	EI	50	6	4	0	0	0
1961	0	EI	85	13	5	0	1	0
6032	1	EI	65	12	8	0	1	1
5155	1	OW	30	8	5	0	0	1
8563	1	EI	70	7	10	0	1	1
9521	1	EI	75	15	9	0	1	1
1490	0	OW	44	5	11	0	0	1
2130	1	OW	50	6	6	0	0	1
2241	1	ID	32	3	7	0	0	1
2690	1	IF	35	5	12	0	1	1
2920	1	ID	52	4	8	0	1	1
3161	0	IF	60	4	4	0	1	1
3332	1	ID	53	5	6	0	1	1
3377	1	OW	45	4	10	0	0	1
3818	0	OW	18	6	11	2	0	1
4674	1	MK	65	4	11	0	1	1
5114	1	OW	25	5	6	0	0	1
6095	0	ID	28	4	19	0	0	0
6321	1	OW	23	6	NA	0	1	1
6503	1	OW	20	0	NA	0	0	0
6604	1	EI	38	3	13	0	1	0
7050	1	IF	60	3	6	0	1	1
7269	1	EI	50	26	13	0	0	0
7421	1	EI	30	4	NA	0	1	1
7611	0	OW	30	3	13	0	0	1
8248	1	IF	50	9	8	0	1	1
8593	0	OW	28	3	3	0	0	1
8874	0	ID	60	5	7	0	0	1
9923	1	OW	56	11	7	0	1	1
9970	1	ID	60	9	12	0	1	0
1000	0	OW	60	8	4	1	0	1
1042	0	MK	55	5	6	1	1	1
1071	1	MK	50	13	9	1	1	1
1105	0	MK	36	4	4	1	1	0
1209	0	MK	40	9	11	1	0	1
1228	0	EI	32	2	15	1	1	0
1310	0	MK	33	2	13	1	0	0
1326	1	ID	35	7	12	1	1	1
1509	1	OW	23	5	8	1	1	1
1531	1	OW	25	11	11	1	0	1
1575	0	EI	45	7	5	1	0	0
1592	1	MK	NA	8	9	1	0	0
1657	0	MK	50	6	5	1	0	1
1713	1	MK	18	0	9	1	0	1
1755	1	IF	45	8	10	1	0	1
1782	1	OW	31	9	8	1	1	1
1840	0	OW	56	2	5	1	1	1
1880	0	OW	40	9	13	1	0	1
1997	1	OW	30	5	9	1	0	1
2175	1	EI	21	3	11	1	1	1
2321	0	EI	30	5	12	1	1	0
2368	1	OW	60	16	7	1	0	1
2522	1	ID	27	1	13	1	1	0
2545	1	ID	48	10	17	1	1	1
2573	1	OW	20	7	7	1	0	1
2727	1	OW	25	10	14	1	0	1
2825	0	OW	20	0	4	2	0	1
2863	0	EI	40	6	15	1	1	0
3114	1	OW	35	16	9	1	1	1
3140	0	OW	22	0	8	1	0	0
3239	1	EI	30	5	12	1	1	0
3255	0	ID	26	0	6	1	0	1
3297	1	OW	21	5	NA	1	1	1
3298	1	OW	25	0	8	1	0	1
3302	0	EI	28	5	15	1	0	0
3417	1	ID	40	7	12	1	1	1
3433	1	MK	32	5	8	1	0	0
3436	1	ID	27	6	10	1	0	1
3860	0	ID	45	5	8	1	1	0
3950	0	EI	19	0	8	1	0	0
3985	1	OW	30	7	9	1	0	1
3991	1	ID	20	0	6	1	0	0
4058	1	IF	45	10	12	1	0	1
4128	0	ID	26	0	9	1	0	1
4131	0	EI	41	3	13	1	1	1
4132	0	EI	50	5	3	1	0	0
4253	1	EI	42	6	7	1	1	0
4273	1	MK	32	3	8	1	0	0
4279	0	OW	21	3	5	1	0	0
4412	1	OW	30	0	4	1	1	1
4458	0	OW	34	6	18	1	1	1
4595	0	OW	30	0	5	1	1	0
4643	1	OW	40	8	13	1	1	1
4654	0	OW	21	0	9	1	1	1
4663	1	ID	56	8	15	1	1	0
4703	1	EI	55	15	16	1	1	1
4718	0	OW	35	6	14	1	0	0
4767	1	OW	42	10	NA	1	0	1
4774	1	IF	24	6	13	1	1	1
4847	1	OW	35	4	6	1	1	1
4906	1	IF	65	21	6	1	0	1
5249	0	OW	38	7	11	1	0	1
5263	1	MK	30	1	9	1	1	1
5317	1	IF	45	10	10	1	1	1
5334	1	OW	45	9	11	1	1	1
5380	0	IF	30	4	8	1	1	1
5385	1	OW	25	0	NA	1	1	1
5422	0	EI	38	22	14	1	1	1
5431	0	MK	18	0	10	1	0	1
5441	0	OW	50	4	NA	1	0	1
5467	0	OW	35	0	7	1	0	0
5603	1	ID	29	0	11	1	0	1
5605	1	MK	30	0	7	1	1	1
5615	0	MK	30	4	15	1	1	1
5702	1	IF	45	10	11	1	1	1
5803	1	OW	27	9	4	1	1	1
5938	1	IF	25	0	6	1	1	1
5970	1	EI	25	5	7	1	1	0
5998	0	OW	26	0	4	1	0	1
6013	1	EI	48	8	12	1	1	0
6019	1	OW	45	9	16	1	0	1
6135	1	OW	38	7	12	1	1	1
6268	1	OW	50	6	5	1	1	1
6434	1	EI	45	7	18	1	1	1
6520	1	OW	27	8	4	1	1	1
6547	1	IF	60	17	11	1	1	1
6571	1	IF	25	5	10	1	0	1
6572	1	IF	21	0	5	1	1	0
6606	1	MK	65	4	5	1	0	0
6778	0	EI	43	8	15	1	1	0
6956	1	EI	38	3	5	1	1	1
7108	1	OW	22	0	7	1	0	1
7255	1	EI	38	4	15	1	1	0
7367	1	OW	30	8	4	1	1	1
7505	1	EI	34	5	20	1	0	0
7514	1	OW	58	4	5	1	0	1
7554	1	EI	40	10	4	1	1	1
7574	1	OW	17	0	14	1	0	1
7582	1	ID	38	6	6	1	1	1
7618	1	OW	26	6	7	1	0	1
7627	1	MK	36	5	6	1	0	1
7661	0	MK	31	0	13	1	0	1
7755	1	IF	25	10	14	1	1	1
7790	0	OW	55	19	17	1	0	1
7866	1	EI	45	7	10	1	1	1
7878	0	OW	25	5	3	1	0	1
7952	0	EI	30	4	11	1	1	0
7965	0	MK	87	5	7	1	0	1
8029	1	ID	40	9	12	1	1	1
8042	1	EI	22	4	10	1	1	0
8043	1	OW	35	7	5	1	0	1
8201	1	OW	18	0	12	1	0	0
8316	1	OW	28	7	NA	1	1	1
8345	0	EI	43	8	13	1	0	0
8353	1	EI	27	3	12	1	1	1
8427	1	EI	30	3	9	1	1	0
8667	0	IF	28	9	13	1	0	1
8745	1	OW	15	0	7	1	0	1
8930	0	EI	45	3	9	1	0	0
9014	1	OW	70	13	5	1	0	1
9016	1	MK	30	9	5	1	0	0
9059	1	OW	45	5	15	1	0	1
9096	0	EI	50	11	18	1	0	1
9140	1	OW	45	10	11	1	1	1
9160	1	OW	27	8	13	1	0	1
9180	1	OW	17	0	7	1	0	1
9502	1	OW	25	3	5	1	1	1
9504	1	EI	38	11	16	1	1	1
9668	1	OW	45	6	12	1	0	1
9733	1	MK	67	18	8	1	0	1
9736	1	EI	35	2	10	1	1	0
9766	1	IF	27	6	6	1	1	1
9822	0	EI	31	9	10	1	0	0
1267	1	OW	54	10	7	2	0	1
1340	1	OW	22	0	5	2	0	1
1377	1	OW	36	14	9	2	0	0
1441	1	OW	27	17	NA	2	1	1
1709	0	OW	23	0	18	2	0	0
1712	1	MK	23	3	11	2	1	1
1743	1	OW	25	2	NA	2	0	1
1763	1	ID	38	6	11	2	1	1
1837	0	OW	22	0	4	2	0	0
1837	0	OW	24	3	NA	2	0	1
1918	0	MK	35	2	5	2	0	1
1996	1	OW	25	2	10	2	1	1
2002	1	IF	18	1	8	2	1	1
2097	0	OW	36	6	NA	2	0	1
2193	0	MK	29	0	6	2	0	1
2296	1	OW	22	0	3	2	0	1
2349	1	EI	25	0	13	2	1	1
2389	0	OW	21	0	9	2	0	1
2434	0	OW	45	4	13	2	1	1
2492	1	OW	28	4	11	2	0	1
2500	0	OW	24	0	4	2	0	1
2541	0	MK	18	0	8	2	0	1
2703	0	ID	40	6	12	2	0	1
2825	0	OW	28	3	5	1	0	1
3056	1	EI	50	8	20	2	1	1
3244	0	OW	29	3	9	2	0	1
3269	0	OW	23	2	14	2	1	1
3422	1	OW	16	0	15	2	0	0
3468	0	ID	50	6	15	3	0	1
3547	0	MK	31	0	9	2	0	0
3684	1	MK	25	1	7	2	1	1
3818	1	IF	40	7	9	0	1	1
3844	0	EI	33	3	12	2	0	0
4147	0	EI	22	2	12	2	0	0
4227	1	ID	25	0	9	2	1	1
4358	1	OW	45	11	20	3	1	0
4405	0	EI	21	0	6	2	0	0
4497	0	OW	22	0	7	2	0	1
4515	0	OW	29	3	14	2	0	0
4530	0	OW	23	2	8	2	1	1
4673	1	ID	19	0	10	2	0	0
4815	1	MK	24	1	13	2	0	1
4872	1	OW	35	7	NA	2	0	1
4987	0	OW	17	0	13	2	1	1
4990	0	EI	19	0	8	2	0	0
5036	0	ID	29	1	11	2	0	0
5183	1	IF	20	0	5	2	1	1
5199	1	OW	19	0	13	2	1	1
5283	1	OW	23	0	16	2	0	1
5407	0	EI	28	3	6	2	1	1
5745	0	OW	20	0	15	2	0	0
5747	1	OW	43	6	7	2	0	1
5820	1	EI	32	5	7	2	1	1
5978	0	EI	22	0	8	2	0	0
6028	1	OW	18	0	16	2	0	0
6032	1	OW	22	1	9	2	1	1
6158	0	MK	28	0	14	2	0	1
6214	0	OW	35	5	5	2	0	0
6229	0	OW	27	0	7	2	1	1
6288	0	OW	20	0	6	2	0	1
6371	0	OW	36	6	15	2	0	1
6428	1	OW	55	3	6	2	1	1
6498	0	MK	20	0	8	2	0	1
7059	1	EI	29	4	7	2	1	1
7067	0	EI	27	1	6	2	1	0
7120	0	MK	26	0	6	2	0	1
7187	1	EI	42	8	15	2	1	1
7199	0	OW	20	5	14	2	0	1
7298	0	IF	44	6	10	2	1	1
7379	1	ID	34	6	9	2	0	1
7606	1	OW	25	0	10	2	0	1
7613	0	MK	42	3	14	2	0	0
7643	1	ID	50	19	15	NA	1	1
7777	1	MK	26	0	NA	2	0	1
7919	1	OW	35	6	6	2	1	1
8015	1	MK	30	2	9	2	0	1
8033	1	OW	23	1	9	2	0	1
8185	1	MK	38	1	4	2	1	1
8480	1	OW	36	3	NA	2	1	1
8613	1	OW	24	1	6	2	1	1
8644	0	OW	39	4	6	2	1	1
8809	0	IF	22	1	8	2	1	1
8828	0	OW	23	0	12	2	0	0
8843	0	OW	23	2	6	2	0	1
8870	0	ID	29	0	13	2	0	0
8913	1	OW	55	16	10	2	0	1
9025	1	OW	26	1	7	2	0	1
9132	1	EI	60	13	14	2	1	1
9159	1	OW	16	0	3	2	1	1
9210	1	IF	35	9	9	2	1	0
9211	1	OW	93	0	8	2	1	1
9247	1	IF	25	0	11	2	1	1
9318	0	IF	37	5	7	2	1	0
9332	1	ID	21	0	9	2	1	1
9346	1	MK	45	9	10	2	0	1
9361	1	MK	32	3	15	2	0	1
9450	0	OW	27	2	12	2	0	0
9504	0	ID	38	4	13	2	0	1
9542	1	OW	35	7	14	2	1	1
9580	1	OW	52	9	15	2	1	1
9628	0	EI	55	4	7	2	0	0
9693	0	ID	45	6	9	2	0	1
9751	1	OW	46	9	6	2	1	1
2163	1	MK	28	1	13	3	0	0
2362	1	OW	42	9	5	3	1	1
2607	1	MK	30	5	7	3	1	1
2683	1	OW	18	0	16	3	0	0
3408	1	MK	22	0	15	3	1	1
3463	1	MK	50	5	11	3	0	1
3764	1	OW	32	7	9	3	1	1
4196	1	ID	39	4	12	3	1	0
4197	0	MK	34	5	5	3	0	0
4358	0	OW	28	3	10	2	0	1
4367	1	MK	45	2	8	3	0	1
4424	0	ID	30	1	15	3	1	1
4479	1	OW	NA	12	14	3	0	1
4635	0	MK	50	6	12	3	0	0
4684	0	IF	27	0	15	3	1	1
4837	1	OW	28	3	9	3	0	1
4846	1	OW	45	11	9	3	1	1
4861	0	MK	25	3	7	3	0	0
4936	1	ID	45	8	13	3	1	1
4983	0	MK	56	5	16	3	0	1
5042	0	OW	29	1	6	3	0	1
5193	0	OW	47	9	14	3	0	1
5379	1	MK	56	10	11	3	1	1
5434	0	OW	36	8	10	3	1	0
5843	0	EI	27	1	13	3	1	1
5926	0	ID	42	16	16	3	1	0
6290	0	EI	35	0	6	3	1	1
6390	1	OW	40	12	16	3	0	1
6402	0	MK	34	3	12	3	1	1
6787	1	MK	37	6	14	3	1	1
7095	0	OW	82	11	16	3	0	1
7177	1	MK	23	7	18	3	1	1
7809	1	MK	50	8	15	3	0	1
7974	0	IF	45	9	15	3	1	1
8425	1	MK	35	3	12	3	0	1
8490	0	MK	30	4	9	3	0	1
8507	1	OW	56	16	19	3	0	1
8873	0	ID	70	11	14	3	0	1
8910	1	ID	50	7	14	3	1	1
9501	0	ID	30	4	16	3	1	1
9696	0	EI	48	9	16	3	0	0
9769	0	MK	32	4	13	3	1	1
2474	1	MK	22	0	19	3	1	1
1778	0	ID	30	5	15	3	1	1
3186	1	OW	24	1	8	3	1	0
3468	0	OW	20	0	8	2	0	1
3943	0	EI	35	9	13	3	1	1
4988	0	OW	23	0	10	3	0	1
5079	0	EI	27	1	8	3	0	1
5975	0	IF	27	0	12	3	1	1
6132	0	IF	28	1	16	3	1	1
7355	1	ID	29	2	17	3	1	1
7586	0	OW	28	0	14	3	0	1
7602	0	OW	22	1	16	3	0	1
7771	0	ID	38	4	16	3	1	1
8639	1	ID	35	2	17	3	1	1
9779	0	ID	27	0	14	3	1	1
3323	0	IF	40	9	14	NA	0	0
6354	0	OW	27	5	8	NA	0	1
7643	0	MK	29	1	9	2	0	1
